# Supplementary material
Source: PubMed Central journal article supplement (PMC11073286)
Supplement: 18_2022_4460_MOESM1_ESM.pdf [file 18_2022_4460_MOESM1_ESM.pdf]

## Supplementary data

### Activation of the hypoxia response protects mice from amyloid- $\beta$ accumulation

Teemu Ollonen<sup>1\*</sup>, Margareta Kurkela<sup>1\*</sup>, Anna Laitakari<sup>1</sup>, Samuli Sakko<sup>1</sup>, Henna Koivisto<sup>2</sup>, Johanna Myllyharju<sup>1</sup>, Heikki Tanila<sup>2</sup>, Raisa Serpi<sup>1</sup>, and Peppi Koivunen<sup>1</sup>

<sup>1</sup>Biocenter Oulu, Faculty of Biochemistry and Molecular Medicine, Oulu Center for Cell-Matrix Research, University of Oulu, Oulu, Finland. <sup>2</sup>A.I. Virtanen Institute for Molecular Sciences, University of Eastern Finland, Kuopio, Finland.

\*These authors contributed equally

Short title: Hypoxia and amyloid- $\beta$

Correspondence to: Peppi Koivunen, MD, PhD, Faculty of Biochemistry and Molecular Medicine, University of Oulu, Aapistie 7C, P.O. Box 5400, FIN-90014, Finland, Email

[peppi.koivunen@oulu.fi](mailto:peppi.koivunen@oulu.fi), Tel. +358-8-5375822

**Supplemental Table 1.** Pearson correlation coefficients of anthropometric and metabolic parameters and mRNA levels of all mice. WAT, white adipose tissue weight; liver, liver weight; b, blood; C, cortical; A $\beta$ , amyloid- $\beta$ ; trigly, triglycerides; glyc, glycogen; chol, cholesterol; WAT macroph, WAT macrophage aggregates; H, hippocampal. Significant associations ( $P < 0.05$ ) are indicated by bold.

| 4 mo correlation  |  | WAT         | Liver        | b-Glucose    | b-Lactate    | s-Insulin   | b-Hemoglobin | Body weight | HOMA-IR     | C A $\beta$  | H A $\beta$  | Liver Trigly | Liver Glyc   | s-Trigly   | s-Chol      | s-HDL  | C Xbp1      | C Hspa5     | C Atf6      | C Eif2ak3   | H Xbp1       | H Hspa5     | H Atf6      | H Eif2ak3    | C Trem2     | H Trem2      | C cFOS      | H cFOS      | C BTG2      | H BTG2      | C Arc       | H Arc       | C Dusp1     | H Dusp1 |       |         |         |         |  |
|-------------------|--|-------------|--------------|--------------|--------------|-------------|--------------|-------------|-------------|--------------|--------------|--------------|--------------|------------|-------------|--------|-------------|-------------|-------------|-------------|--------------|-------------|-------------|--------------|-------------|--------------|-------------|-------------|-------------|-------------|-------------|-------------|-------------|---------|-------|---------|---------|---------|--|
| WAT               |  |             |              |              |              |             |              |             |             |              |              |              |              |            |             |        |             |             |             |             |              |             |             |              |             |              |             |             |             |             |             |             |             |         |       |         |         |         |  |
| Liver             |  | <b>0.56</b> |              |              |              |             |              |             |             |              |              |              |              |            |             |        |             |             |             |             |              |             |             |              |             |              |             |             |             |             |             |             |             |         |       |         |         |         |  |
| b-Glucose         |  | <b>0.41</b> | 0.30         |              |              |             |              |             |             |              |              |              |              |            |             |        |             |             |             |             |              |             |             |              |             |              |             |             |             |             |             |             |             |         |       |         |         |         |  |
| b-Lactate         |  | -0.09       | -0.39        | -0.07        |              |             |              |             |             |              |              |              |              |            |             |        |             |             |             |             |              |             |             |              |             |              |             |             |             |             |             |             |             |         |       |         |         |         |  |
| s-Insulin         |  | <b>0.53</b> | <b>0.43</b>  |              | 0.10         |             |              |             |             |              |              |              |              |            |             |        |             |             |             |             |              |             |             |              |             |              |             |             |             |             |             |             |             |         |       |         |         |         |  |
| b-Hemoglobin      |  | -0.18       | -0.22        | -0.15        | 0.21         | -0.04       |              |             |             |              |              |              |              |            |             |        |             |             |             |             |              |             |             |              |             |              |             |             |             |             |             |             |             |         |       |         |         |         |  |
| Body weight       |  | 0.37        | <b>0.56</b>  | 0.05         | <b>-0.44</b> | <b>0.22</b> | -0.27        |             |             |              |              |              |              |            |             |        |             |             |             |             |              |             |             |              |             |              |             |             |             |             |             |             |             |         |       |         |         |         |  |
| HOMA-IR           |  | <b>0.62</b> | <b>0.50</b>  | <b>0.46</b>  | <b>0.08</b>  | <b>0.90</b> | -0.10        | 0.20        |             |              |              |              |              |            |             |        |             |             |             |             |              |             |             |              |             |              |             |             |             |             |             |             |             |         |       |         |         |         |  |
| C A $\beta$       |  | -0.02       | 0.04         | <b>-0.46</b> | <b>-0.35</b> | <b>0.40</b> | 0.04         | <b>0.42</b> | 0.12        |              |              |              |              |            |             |        |             |             |             |             |              |             |             |              |             |              |             |             |             |             |             |             |             |         |       |         |         |         |  |
| H A $\beta$       |  | 0.07        | 0.06         | <b>-0.40</b> | <b>-0.35</b> | <b>0.45</b> | 0.19         | <b>0.32</b> | 0.17        | <b>0.63</b>  |              |              |              |            |             |        |             |             |             |             |              |             |             |              |             |              |             |             |             |             |             |             |             |         |       |         |         |         |  |
| Liver Trigly      |  | <b>0.52</b> | 0.20         | 0.36         | -0.14        | 0.20        | -0.16        | 0.00        | 0.34        | -0.25        | -0.07        |              |              |            |             |        |             |             |             |             |              |             |             |              |             |              |             |             |             |             |             |             |             |         |       |         |         |         |  |
| Liver Glyc        |  | <b>0.42</b> | <b>0.46</b>  | 0.35         | -0.07        | 0.33        | -0.27        | 0.26        | <b>0.45</b> | 0.13         | 0.17         | 0.10         |              |            |             |        |             |             |             |             |              |             |             |              |             |              |             |             |             |             |             |             |             |         |       |         |         |         |  |
| s-Trigly          |  | 0.08        | 0.07         | -0.07        | -0.05        | 0.33        | -0.03        | 0.12        | 0.23        | <b>0.48</b>  | <b>0.46</b>  | -0.05        | 0.23         |            |             |        |             |             |             |             |              |             |             |              |             |              |             |             |             |             |             |             |             |         |       |         |         |         |  |
| s-Chol            |  | <b>0.67</b> | <b>0.58</b>  | <b>0.62</b>  | -0.18        | 0.23        | -0.12        | 0.26        | <b>0.46</b> | <b>-0.48</b> | <b>-0.36</b> | <b>0.41</b>  | <b>0.51</b>  | 0.04       |             |        |             |             |             |             |              |             |             |              |             |              |             |             |             |             |             |             |             |         |       |         |         |         |  |
| s-HDL             |  | <b>0.53</b> | <b>0.42</b>  | <b>0.53</b>  | 0.00         | 0.21        | -0.19        | 0.21        | <b>0.40</b> | -0.24        | -0.25        | 0.12         | 0.54         | 0.19       | <b>0.77</b> |        |             |             |             |             |              |             |             |              |             |              |             |             |             |             |             |             |             |         |       |         |         |         |  |
| C Xbp1            |  | 0.32        | <b>0.52</b>  | 0.10         | 0.00         | 0.20        | -0.24        | 0.15        | 0.32        | -0.05        | 0.11         | -0.11        | <b>0.71</b>  | 0.07       | 0.20        | 0.05   |             |             |             |             |              |             |             |              |             |              |             |             |             |             |             |             |             |         |       |         |         |         |  |
| C Hspa5           |  | 0.31        | <b>0.56</b>  | 0.05         | -0.07        | 0.14        | -0.63        | <b>0.41</b> | 0.18        | 0.13         | 0.04         | -0.10        | <b>0.55</b>  | 0.08       | 0.21        | 0.09   | <b>0.81</b> |             |             |             |              |             |             |              |             |              |             |             |             |             |             |             |             |         |       |         |         |         |  |
| C Atf6            |  | 0.11        | <b>0.41</b>  | 0.23         | 0.08         | 0.11        | -0.21        | -0.04       | 0.31        | 0.03         | -0.06        | -0.01        | <b>0.58</b>  | 0.16       | 0.26        | 0.05   | <b>0.75</b> | <b>0.73</b> |             |             |              |             |             |              |             |              |             |             |             |             |             |             |             |         |       |         |         |         |  |
| C Eif2ak3         |  | 0.01        | 0.31         | 0.08         | -0.10        | -0.03       | -0.16        | -0.04       | 0.10        | 0.08         | -0.07        | -0.15        | <b>0.57</b>  | 0.06       | 0.03        | 0.09   | <b>0.71</b> | <b>0.68</b> | <b>0.77</b> |             |              |             |             |              |             |              |             |             |             |             |             |             |             |         |       |         |         |         |  |
| H Xbp1            |  | 0.14        | 0.36         | 0.08         | -0.06        | 0.10        | -0.28        | 0.13        | 0.20        | 0.04         | -0.10        | -0.37        | <b>0.57</b>  | 0.17       | -0.01       | -0.12  | <b>0.79</b> | <b>0.73</b> | <b>0.67</b> | <b>0.59</b> |              |             |             |              |             |              |             |             |             |             |             |             |             |         |       |         |         |         |  |
| H Hspa5           |  | <b>0.49</b> | <b>0.54</b>  | 0.13         | 0.13         | 0.32        | <b>-0.50</b> | <b>0.33</b> | <b>0.48</b> | 0.04         | -0.02        | -0.17        | <b>0.58</b>  | -0.01      | 0.30        | 0.13   | <b>0.76</b> | <b>0.81</b> | <b>0.59</b> | <b>0.48</b> | <b>0.65</b>  |             |             |              |             |              |             |             |             |             |             |             |             |         |       |         |         |         |  |
| H Atf6            |  | 0.01        | 0.14         | -0.12        | <b>-0.59</b> | 0.04        | -0.02        | 0.13        | <b>0.45</b> | 0.00         | -0.10        | -0.11        | 0.33         | 0.18       | -0.27       | -0.22  | <b>0.38</b> | <b>0.46</b> | <b>0.37</b> | <b>0.63</b> | <b>0.55</b>  | 0.22        |             |              |             | <b>0.70</b>  |             |             |             |             |             |             |             |         |       |         |         |         |  |
| H Eif2ak3         |  | 0.05        | 0.35         | 0.01         | <b>-0.64</b> | -0.16       | -0.24        | 0.24        | -0.21       | 0.16         | 0.38         | -0.10        | 0.44         | 0.27       | 0.02        | -0.03  | 0.44        | <b>0.46</b> | <b>0.32</b> | <b>0.48</b> | <b>0.48</b>  | 0.12        | <b>0.70</b> |              |             |              |             |             |             |             |             |             |             |         |       |         |         |         |  |
| C Trem2           |  | 0.14        | 0.13         | -0.10        | <b>-0.42</b> | 0.06        | -0.12        | 0.38        | -0.01       | <b>0.46</b>  | 0.00         | -0.10        | 0.00         | -0.16      | -0.16       | -0.05  | 0.09        | 0.34        | 0.06        | <b>0.47</b> | 0.14         | 0.12        | <b>0.68</b> | 0.27         |             |              |             |             |             |             |             |             |             |         |       |         |         |         |  |
| H Trem2           |  | 0.24        | 0.15         | -0.31        | <b>-0.49</b> | 0.38        | 0.02         | <b>0.57</b> | 0.12        | <b>0.76</b>  | <b>0.54</b>  | -0.07        | 0.14         | 0.39       | -0.39       | -0.19  | -0.04       | 0.12        | -0.14       | 0.00        | 0.15         | -0.02       | <b>0.62</b> | 0.36         | <b>0.53</b> |              |             |             |             |             |             |             |             |         |       |         |         |         |  |
| C cFOS            |  | -0.16       | -0.27        | 0.00         | -0.15        | -0.16       | 0.06         | -0.38       | -0.14       | 0.08         | -0.34        | 0.43         | -0.32        | -0.13      | 0.00        | -0.06  | -0.42       | -0.17       | 0.02        | 0.17        | -0.39        | -0.27       | <b>0.19</b> | -0.17        | 0.39        | -0.09        |             |             |             |             |             |             |             |         |       |         |         |         |  |
| H cFOS            |  | -0.20       | -0.14        | 0.07         | -0.29        | -0.30       | -0.24        | -0.22       | -0.36       | -0.17        | -0.15        | 0.52         | -0.27        | -0.23      | -0.12       | -0.13  | -0.05       | 0.13        | -0.03       | 0.26        | -0.11        | -0.10       | 0.30        | 0.22         | 0.34        | -0.14        | <b>0.61</b> |             |             |             |             |             |             |         |       |         |         |         |  |
| C BTG2            |  | -0.26       | <b>-0.46</b> | -0.22        | 0.09         | 0.05        | 0.22         | -0.40       | -0.07       | 0.15         | -0.22        | 0.38         | -0.57        | -0.09      | -0.19       | -0.27  | -0.64       | -0.37       | -0.18       | -0.15       | <b>-0.50</b> | -0.42       | -0.01       | -0.33        | 0.16        | -0.05        | <b>0.88</b> | 0.41        |             |             |             |             |             |         |       |         |         |         |  |
| H BTG2            |  | -0.14       | -0.23        | 0.00         | -0.37        | -0.10       | 0.06         | -0.20       | 0.12        | 0.01         | 0.51         | -0.37        | -0.11        | -0.34      | -0.20       | -0.26  | -0.11       | -0.21       | 0.18        | -0.26       | <b>-0.36</b> | <b>0.40</b> | 0.19        | <b>0.55</b>  | 0.19        | <b>0.58</b>  | <b>0.84</b> | <b>0.47</b> |             |             |             |             |             |         |       |         |         |         |  |
| C Arc             |  | 0.05        | 0.37         | <b>0.40</b>  | -0.15        | -0.08       | -0.45        | -0.07       | 0.10        | -0.19        | -0.19        | 0.37         | 0.32         | 0.20       | 0.33        | 0.21   | 0.10        | 0.23        | 0.26        | 0.11        | 0.05         | 0.34        | 0.00        | -0.04        | -0.19       | -0.26        | <b>0.54</b> | <b>0.50</b> | <b>0.22</b> | 0.11        |             |             |             |         |       |         |         |         |  |
| H Arc             |  | -0.28       | -0.30        | -0.09        | -0.31        | -0.18       | -0.01        | -0.25       | -0.32       | -0.02        | -0.21        | 0.37         | -0.34        | -0.30      | -0.26       | -0.27  | -0.24       | -0.06       | -0.24       | 0.15        | -0.14        | -0.18       | 0.41        | 0.16         | 0.46        | 0.03         | <b>0.68</b> | <b>0.85</b> | <b>0.58</b> | <b>0.79</b> | 0.35        |             |             |         |       |         |         |         |  |
| C Dusp1           |  | -0.16       | -0.33        | 0.03         | -0.10        | -0.21       | 0.09         | -0.50       | -0.19       | -0.22        | -0.41        | 0.54         | -0.34        | -0.30      | -0.04       | -0.13  | -0.26       | -0.19       | -0.10       | 0.10        | -0.22        | -0.30       | 0.18        | -0.05        | 0.17        | -0.21        | <b>0.80</b> | <b>0.78</b> | <b>0.67</b> | <b>0.69</b> | <b>0.63</b> | <b>0.84</b> |             |         |       |         |         |         |  |
| H Dusp1           |  | -0.23       | 0.15         | -0.03        | -0.07        | -0.19       | -0.34        | -0.08       | -0.13       | -0.20        | -0.73        | -0.08        | -0.17        | -0.40      | -0.04       | -0.11  | -0.11       | 0.05        | <b>0.55</b> | <b>0.48</b> | <b>0.08</b>  | 0.23        | -0.26       | <b>-0.61</b> | -0.18       | <b>-0.51</b> | <b>0.65</b> | 0.11        | <b>0.56</b> | -0.16       | <b>0.51</b> | <b>0.22</b> | <b>0.40</b> |         |       |         |         |         |  |
| 10 mo correlation |  | WAT         | Liver        | b-Glucose    | b-Lactate    | s-Insulin   | b-Hemoglobin | Body weight | HOMA-IR     | C A $\beta$  | H A $\beta$  | C Bace1      | Liver Trigly | Liver Glyc | s-Trigly    | s-Chol | s-HDL       | s-LDL       | WAT macroph | C Xbp1      | C Hspa5      | C Atf6      | C Eif2ak3   | H Xbp1       | H Hspa5     | H Atf6       | H Eif2ak3   | C Trem2     | H Trem2     | C cFOS      | H cFOS      | C BTG2      | H BTG2      | C Arc   | H Arc | C Dusp1 | H Dusp1 | C GLUT1 |  |
| WAT               |  |             |              |              |              |             |              |             |             |              |              |              |              |            |             |        |             |             |             |             |              |             |             |              |             |              |             |             |             |             |             |             |             |         |       |         |         |         |  |
| Liver             |  | <b>0.68</b> |              |              |              |             |              |             |             |              |              |              |              |            |             |        |             |             |             |             |              |             |             |              |             |              |             |             |             |             |             |             |             |         |       |         |         |         |  |
| b-Glucose         |  | <b>0.53</b> | <b>0.49</b>  |              |              |             |              |             |             |              |              |              |              |            |             |        |             |             |             |             |              |             |             |              |             |              |             |             |             |             |             |             |             |         |       |         |         |         |  |
| b-Lactate         |  | 0.18        | 0.07         | 0.33         |              |             |              |             |             |              |              |              |              |            |             |        |             |             |             |             |              |             |             |              |             |              |             |             |             |             |             |             |             |         |       |         |         |         |  |
| s-Insulin         |  | <b>0.61</b> | <b>0.49</b>  | <b>0.51</b>  | -0.01        |             |              |             |             |              |              |              |              |            |             |        |             |             |             |             |              |             |             |              |             |              |             |             |             |             |             |             |             |         |       |         |         |         |  |
| b-Hemoglobin      |  | -0.08       | 0.05         | -0.10        | -0.18        | 0.08        |              |             |             |              |              |              |              |            |             |        |             |             |             |             |              |             |             |              |             |              |             |             |             |             |             |             |             |         |       |         |         |         |  |
| Body weight       |  | <b>0.93</b> | <b>0.69</b>  | <b>0.50</b>  | 0.14         | <b>0.70</b> | 0.01         |             |             |              |              |              |              |            |             |        |             |             |             |             |              |             |             |              |             |              |             |             |             |             |             |             |             |         |       |         |         |         |  |
| HOMA-IR           |  | <b>0.63</b> | <b>0.55</b>  | <b>0.72</b>  | 0.12         | <b>0.95</b> | 0.06         | <b>0.67</b> |             |              |              |              |              |            |             |        |             |             |             |             |              |             |             |              |             |              |             |             |             |             |             |             |             |         |       |         |         |         |  |
| C A $\beta$       |  | 0.12        | 0.00         | -0.07        | -0.06        | 0.0         |              |             |             |              |              |              |              |            |             |        |             |             |             |             |              |             |             |              |             |              |             |             |             |             |             |             |             |         |       |         |         |         |  |

**Supplemental Table 2** RNA sequencing (RNASeq) analysis of the cerebral cortex of the 4-month-old hypoxia and normoxia treated APP/PSEN1 mice (n = 2 + 2). Genes with lowest adjusted *P* values for a difference in expression are indicated. The Log2FoldChange displays the difference in expression level between hypoxia mice and normoxia. The adjusted *P* value displays the significance of the difference in expression levels.

| Gene           | Log2FoldChange | <i>P</i> value adjusted |
|----------------|----------------|-------------------------|
| <i>Mfrp</i>    | 8.4104         | 0.0054                  |
| <i>Dusp1</i>   | 1.0289         | 0.0110                  |
| <i>Shox2</i>   | 4.8264         | 0.0112                  |
| <i>Btg2</i>    | 1.1773         | 0.1052                  |
| <i>c-Fos</i>   | 1.0255         | 0.1119                  |
| <i>Eif2s3y</i> | -1.0067        | 0.2517                  |
| <i>Ciart</i>   | 1.2509         | 0.2517                  |
| <i>Arc</i>     | 0.6472         | 0.2517                  |

**Supplemental Table 3** Primers used in the quantitative PCR analyses.

| Gene             | Forward primer (5' -> 3') | Reverse primer (5' -> 3') |
|------------------|---------------------------|---------------------------|
| <i>Arc</i>       | AAGTGCCGAGCTGAGATGC       | CGACCTGTGCAACCCTTTC       |
| <i>Atf6</i>      | TCGCCTTTTAGTCCGGTTCTT     | GGCTCCATAGGTCTGACTCC      |
| <i>Bace1</i>     | GGAACCCATCTCGGCATCC       | TCCGATTCCTCGTCGGTCTC      |
| <i>Btg2</i>      | ATGAGCCACGGGAAGAGAAC      | GCCCTACTGAAAACCTTGAGTC    |
| <i>Dusp1</i>     | GTTGTTGGATTGTCGCTCCTT     | TTGGGCACGATATGCTCCAG      |
| <i>Eif2ak3</i>   | AGTCCCTGCTCGAATCTTCCT     | TCCAAGGCAGAACAGATATACC    |
| <i>c-Fos</i>     | CGGGTTTCAACGCCGACTA       | TTGGCACTAGAGACGGACAGA     |
| <i>Hif-p4h-2</i> | GCGTCCAGTCTTTATTTAGATA    | CTGGGCAACTACAGGATAAAC     |
| <i>Hspa5</i>     | ACTTGGGGACCACCTATTCT      | ATCGCCAATCAGACGCTCC       |
| <i>Trem2</i>     | TGGAACCGTCACCATCACTC      | TGGTCATCTAGAGGGTCCTCC     |
| <i>Xbp1</i>      | AGCTTTTACGGGAGAAACTCAC    | CCTCTGGAACCTCGTCAGGA      |

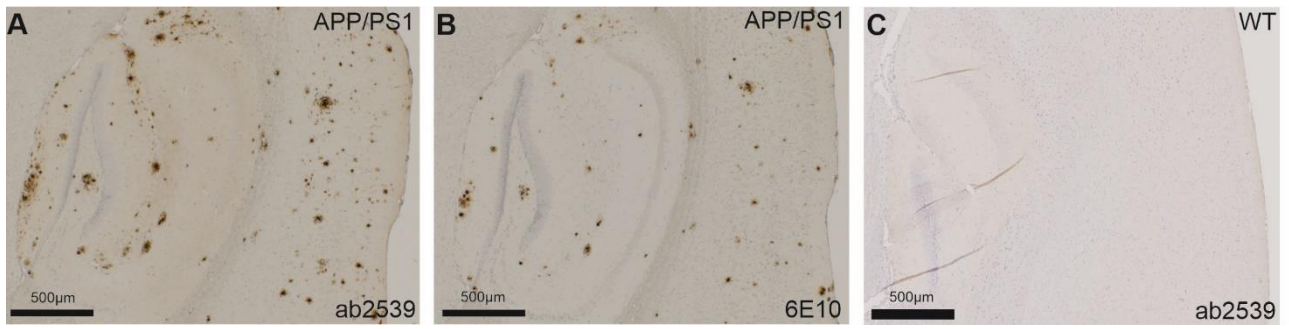

**Fig. S1. Validation of the A $\beta$  antibody.** (A) Mouse/human A $\beta$  binding antibody ab2539 detects amyloid plaques consisting of mixed mouse and human A $\beta$  correspondingly to (B) human A $\beta$  specific 6E10 in the cortex and hippocampus of the APP/PSEN1 mice but not in wild type (WT) (C).

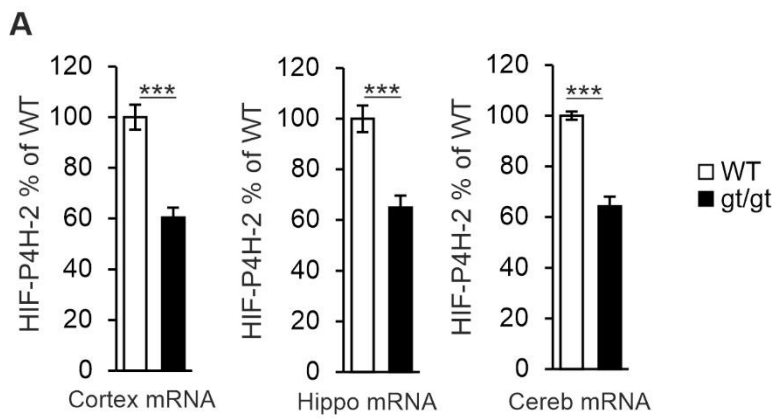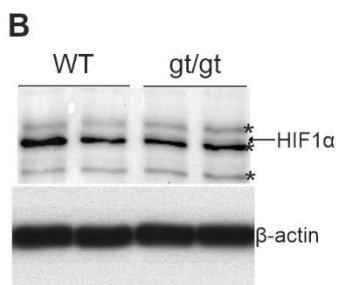

**Fig. S2. HIF1 $\alpha$  is stabilized in *Hif-p4h-2<sup>gt/gt</sup>* brain.** HIF stabilisation in wild-type (WT) and *Hif-p4h-2<sup>gt/gt</sup>* (gt/gt) brain. (A) qPCR analysis of *Hif-p4h-2* mRNA in cortex, hippocampus and cerebellum of WT and gt/gt mice. Data are means  $\pm$  SEM. \*\*\* $P < 0.005$  in T-test.  $n = 10$  WT, 10 gt/gt. (B) Western blot analysis of HIF1 $\alpha$  in hippocampus of WT and gt/gt mice. \*indicates non-specific bands.  $\beta$ -actin was used as a loading control.

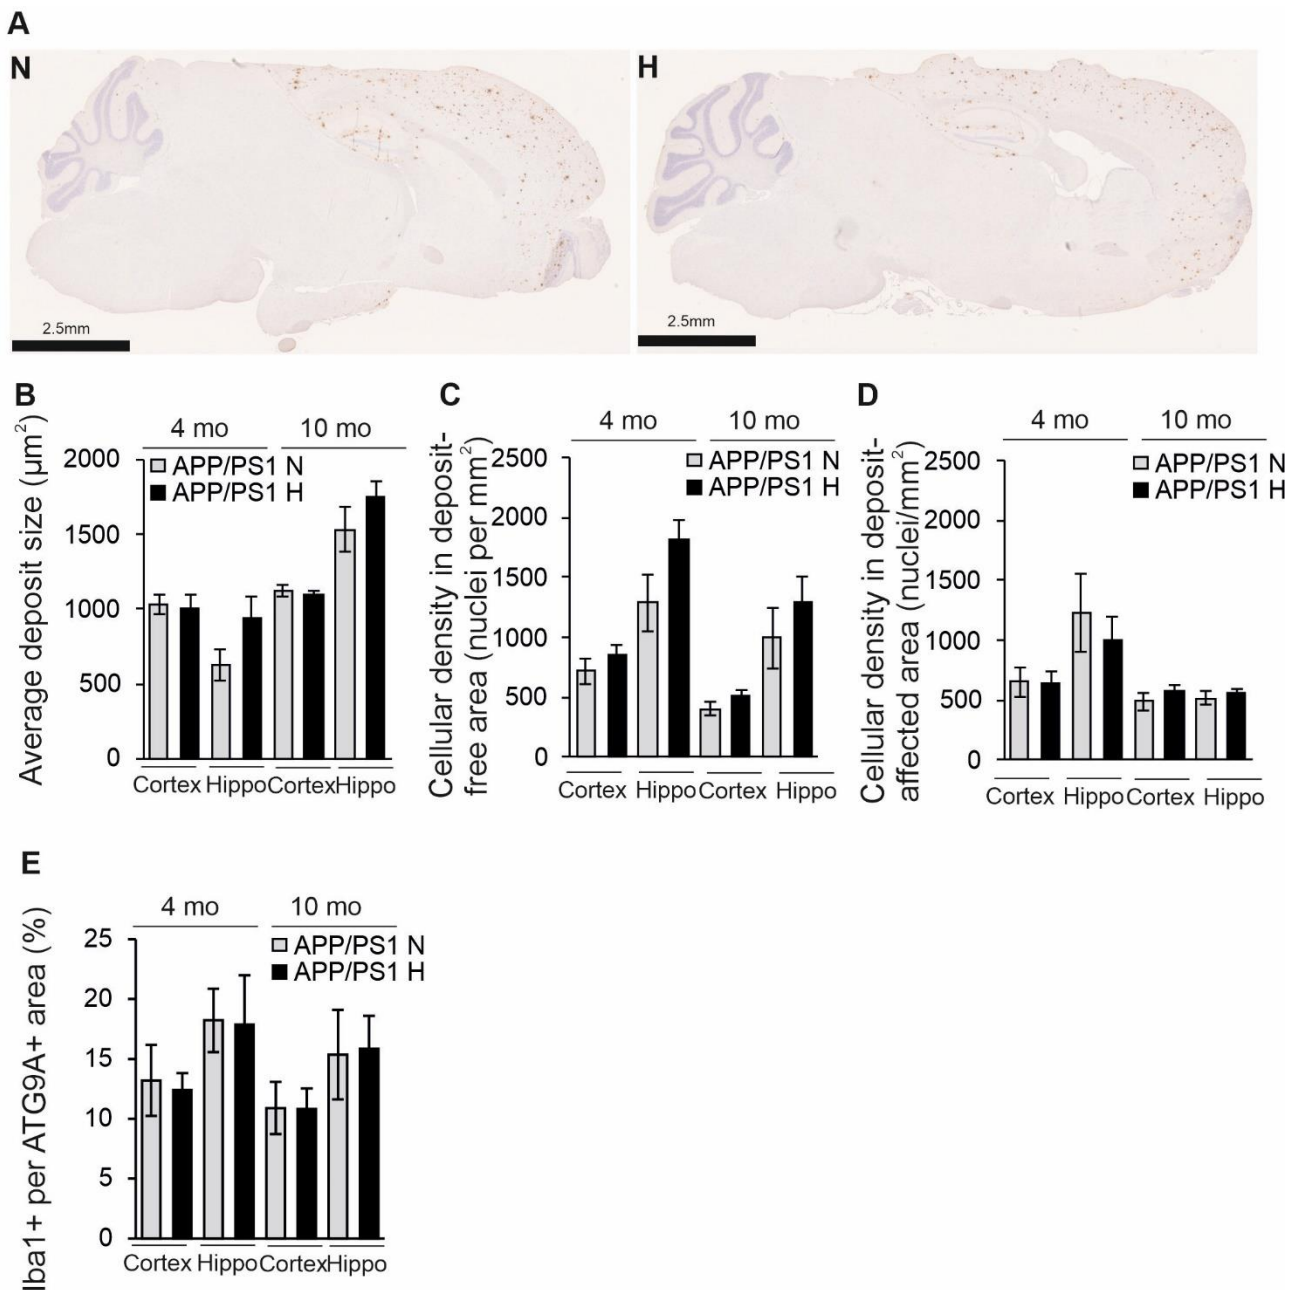

**Fig. S3. Immunohistochemical analysis of A $\beta$  plaques, nuclear density, dystrophic neurites and microglia in normoxia and hypoxia treated APP/PSEN1 cortex and hippocampus. (A) Examples of immunohistochemical stainings of sagittal brain sections of 10-month-old APP/PS1 mice with the human specific 6E10 antibody. (B) Quantification of average size of A $\beta$  positive plaques. Total cellular density in deposit-free area (C) and deposit-affected area (D). IBA1-positive area in ATG9A-positive area (E). n = 8 APP/PSEN1 N 4 mo, n = 9-10 APP/PSEN1 H 4 mo, n = 8-9 APP/PSEN1 N**

10 mo, n = 9-11 APP/PSEN1 H 10 mo. Abbreviations: Hippo, hippocampus; H, hypoxia; mo, months old; N, normoxia.



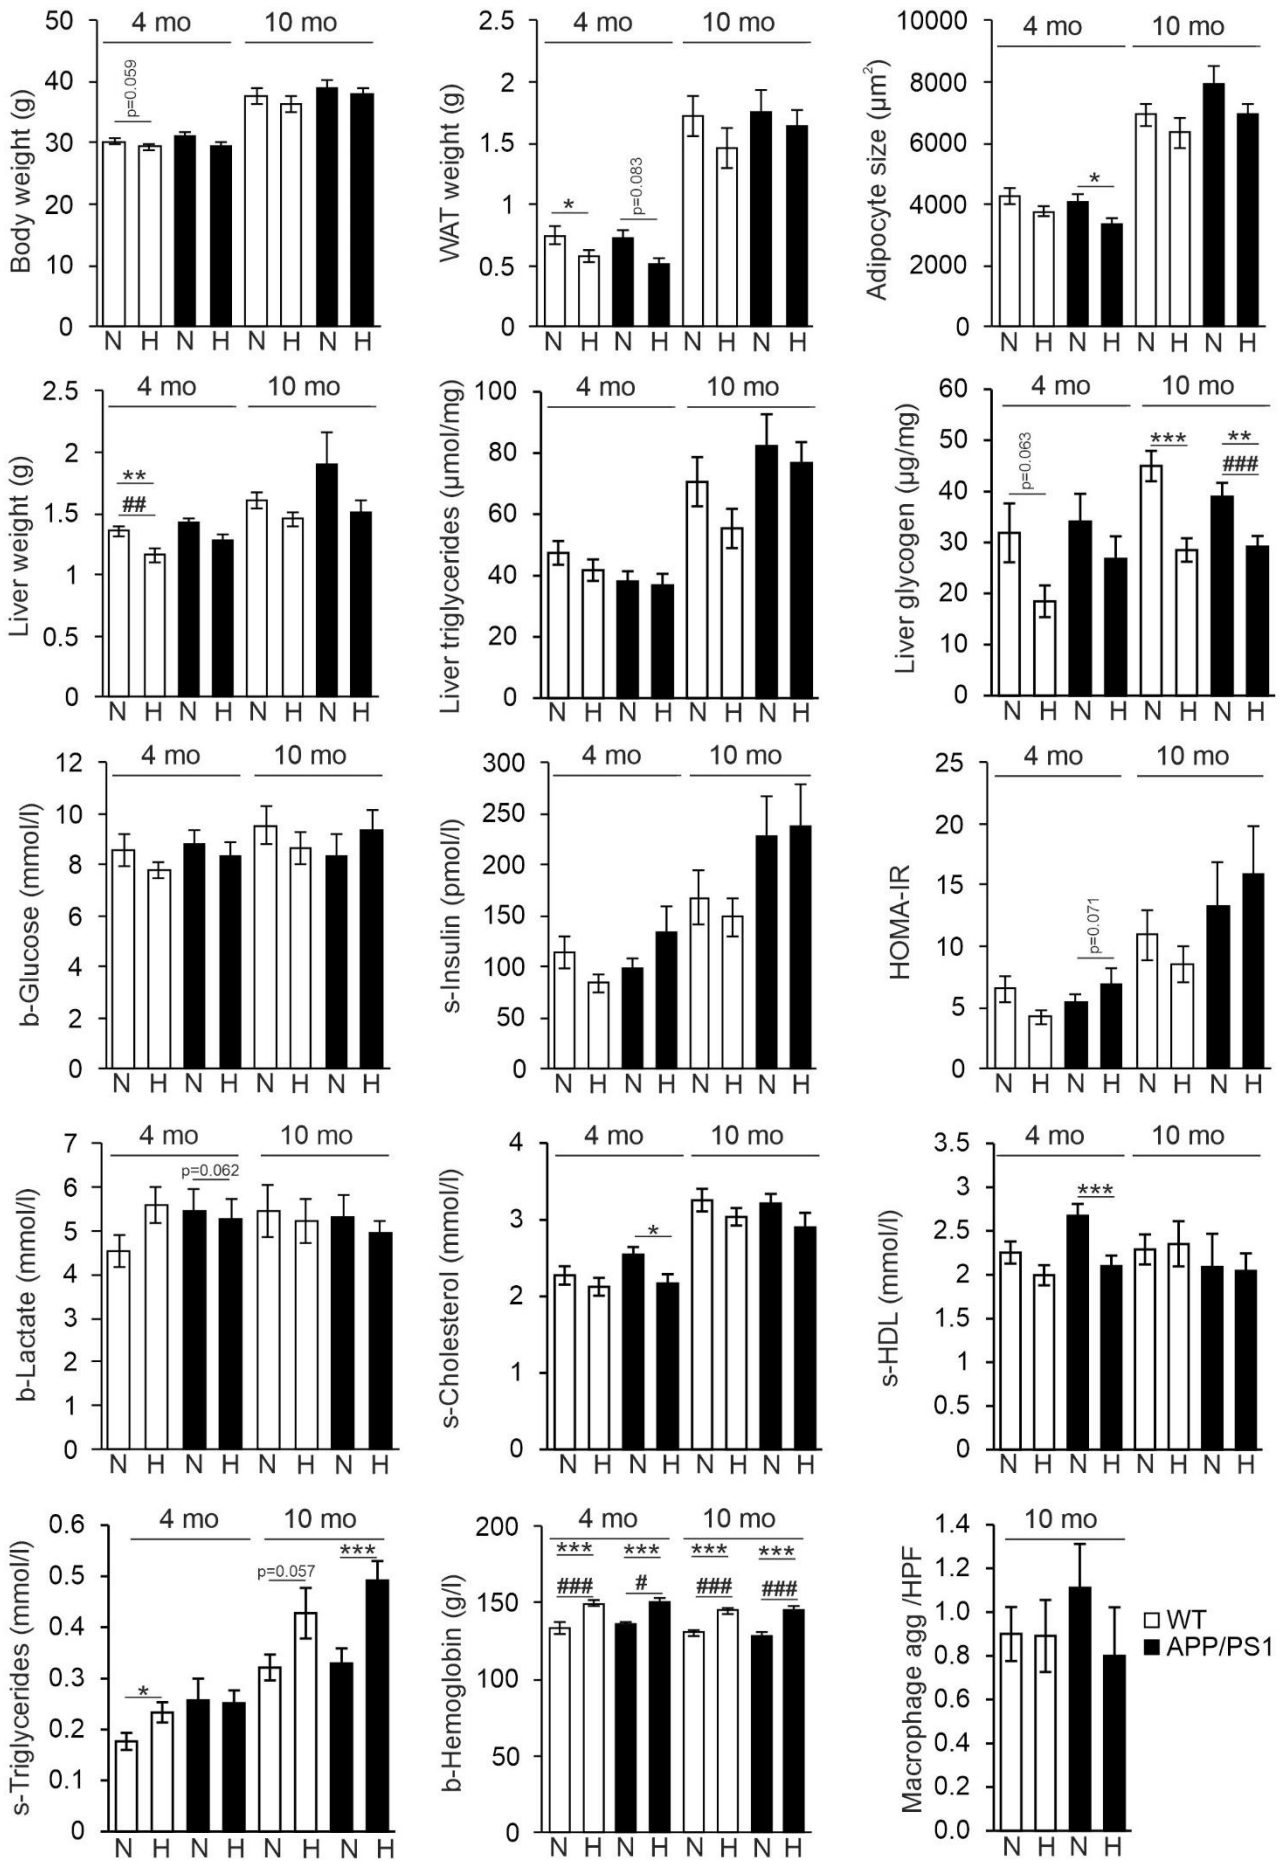

**Fig. S4. Hypoxia treatment improves metabolic parameters in APP/PSEN1 mice.** Metabolic parameters of wild-type (WT) and APP/PSEN1 mice after 6 weeks of hypoxia treatment. Data are means  $\pm$  SEM. \* $P < 0.05$ , \*\* $P < 0.01$ , \*\*\* $P < 0.005$  in T-test, # $P < 0.05$ , ## $P < 0.01$ , ### $P < 0.005$  in 2-way ANOVA. n = 14 WT N 4 mo, 12 WT H 4 mo, 8 APP/PSEN1 N 4 mo, 9-10 APP/PSEN1 H 4 mo, 13-14 WT N 10 mo, 10-11 WT H 10 mo, 9 APP/PSEN1 N 10 mo, 10-11 APP/PSEN1 H 10 mo. Abbreviations: agg, aggregates; b, blood; HPF, high power field; H, hypoxia; mo, months old; N, normoxia; s, serum; WAT, white adipose tissue.

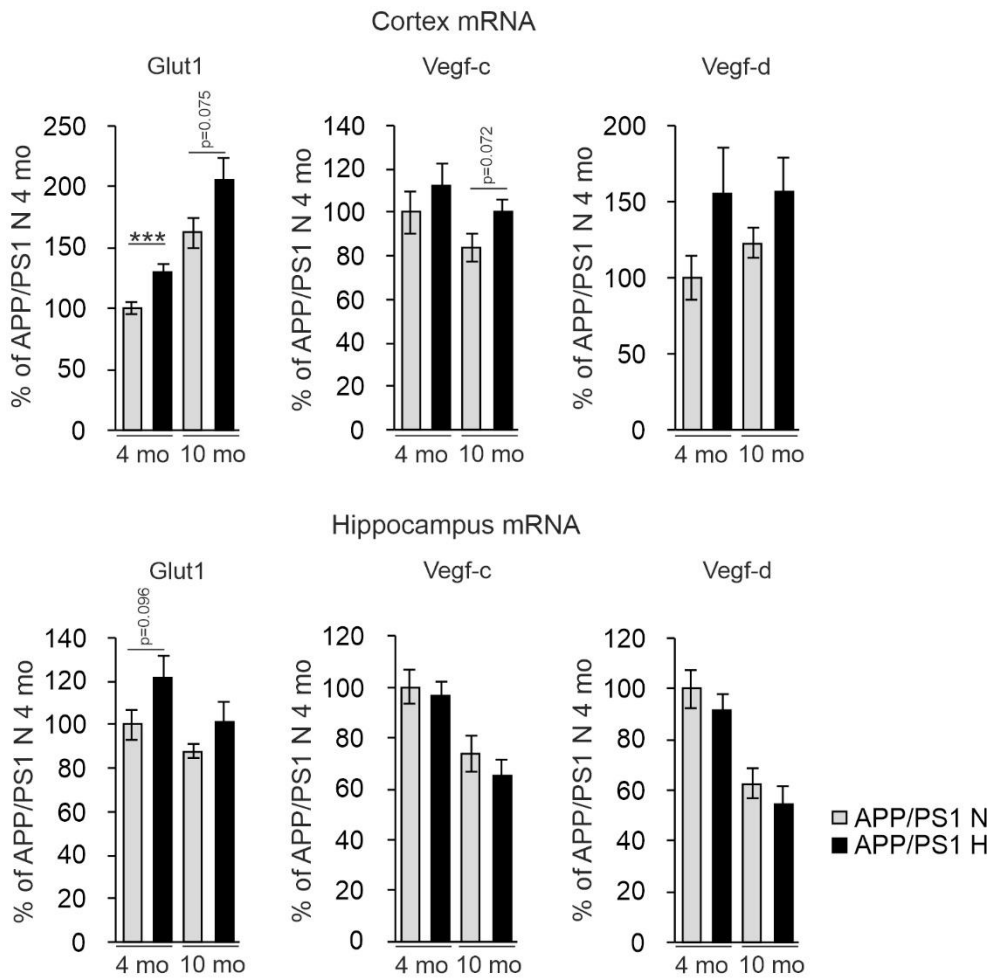

**Fig. S5. Expression of angiogenic mRNAs in the APP/PSEN1 brain following hypoxic exposure.** mRNA expression after 6 weeks of normoxia or hypoxia treatment in cortex and hippocampus of APP/PSEN1 mice. Data are means  $\pm$  SEM. \*\*\* $P$ <0.005 in T-test.  $n = 8$  N 4 mo, 9-10 H 4 mo, 8-9 N 10 mo, 10-11 H 10 mo. Abbreviations: H, hypoxia; mo, months old; N, normoxia.
